# Supplementary material for: CLIMB: High-dimensional association detection in large scale genomic data
Source: PubMed Central journal article supplement (PMC9653391; doi:10.1038/s41467-022-34360-z), 2022-11-12
Supplement: 41467_2022_34360_MOESM2_ESM.pdf [file 41467_2022_34360_MOESM2_ESM.pdf]

# Description of Additional Supplementary Files

File Name: Supplementary Data 1

Description: List of differentially expressed genes identified by CLIMB and DESeq2 in each of the studied lineages.

File Name: Supplementary Data 2

Description: Full GO analysis results for differentially expressed genes identified by CLIMB in the erythroid lineage.

File Name: Supplementary Data 3

Description: Full GO analysis results for differentially expressed genes identified by CLIMB in the megakaryocytic lineage.

File Name: Supplementary Data 4

Description: Full GO analysis results for differentially expressed genes identified by CLIMB in the myeloid lineage.

File Name: Supplementary Data 5

Description: Full GO analysis results for differentially expressed genes identified by DESeq2 in the erythroid lineage.

File Name: Supplementary Data 6

Description: Full GO analysis results for differentially expressed genes identified by DESeq2 in the megakaryocytic lineage.

File Name: Supplementary Data 7

Description: Full GO analysis results for differentially expressed genes identified by DESeq2 in the myeloid lineage.

File Name: Supplementary Data 8

Description: Identifiers for subset of DNase-seq experiments used from Meuleman et al. (2020)
