# Supplementary material for: CLIMB: High-dimensional association detection in large scale genomic data
Source: PubMed Central journal article supplement (PMC9653391; doi:10.1038/s41467-022-34360-z), 2022-11-12
Supplement: 41467_2022_34360_MOESM11_ESM.pdf [file 41467_2022_34360_MOESM11_ESM.pdf]

## Reporting Summary

Nature Portfolio wishes to improve the reproducibility of the work that we publish. This form provides structure for consistency and transparency in reporting. For further information on Nature Portfolio policies, see our [Editorial Policies](#) and the [Editorial Policy Checklist](#).

### Statistics

For all statistical analyses, confirm that the following items are present in the figure legend, table legend, main text, or Methods section.

- |                                     |                                                                                                                                                                                                                                                                                                |
|-------------------------------------|------------------------------------------------------------------------------------------------------------------------------------------------------------------------------------------------------------------------------------------------------------------------------------------------|
| n/a                                 | Confirmed                                                                                                                                                                                                                                                                                      |
| <input type="checkbox"/>            | <input checked="" type="checkbox"/> The exact sample size ( $n$ ) for each experimental group/condition, given as a discrete number and unit of measurement                                                                                                                                    |
| <input type="checkbox"/>            | <input checked="" type="checkbox"/> A statement on whether measurements were taken from distinct samples or whether the same sample was measured repeatedly                                                                                                                                    |
| <input type="checkbox"/>            | <input checked="" type="checkbox"/> The statistical test(s) used AND whether they are one- or two-sided<br><i>Only common tests should be described solely by name; describe more complex techniques in the Methods section.</i>                                                               |
| <input checked="" type="checkbox"/> | <input type="checkbox"/> A description of all covariates tested                                                                                                                                                                                                                                |
| <input type="checkbox"/>            | <input checked="" type="checkbox"/> A description of any assumptions or corrections, such as tests of normality and adjustment for multiple comparisons                                                                                                                                        |
| <input type="checkbox"/>            | <input checked="" type="checkbox"/> A full description of the statistical parameters including central tendency (e.g. means) or other basic estimates (e.g. regression coefficient) AND variation (e.g. standard deviation) or associated estimates of uncertainty (e.g. confidence intervals) |
| <input type="checkbox"/>            | <input checked="" type="checkbox"/> For null hypothesis testing, the test statistic (e.g. $F$ , $t$ , $r$ ) with confidence intervals, effect sizes, degrees of freedom and $P$ value noted<br><i>Give <math>P</math> values as exact values whenever suitable.</i>                            |
| <input type="checkbox"/>            | <input checked="" type="checkbox"/> For Bayesian analysis, information on the choice of priors and Markov chain Monte Carlo settings                                                                                                                                                           |
| <input checked="" type="checkbox"/> | <input type="checkbox"/> For hierarchical and complex designs, identification of the appropriate level for tests and full reporting of outcomes                                                                                                                                                |
| <input type="checkbox"/>            | <input checked="" type="checkbox"/> Estimates of effect sizes (e.g. Cohen's $d$ , Pearson's $r$ ), indicating how they were calculated                                                                                                                                                         |

*Our web collection on [statistics for biologists](#) contains articles on many of the points above.*

### Software and code

Policy information about [availability of computer code](#)

Data collection

Data analysis

SCREEN (no version number)  
 STAR v2.5.1b\_modified  
 STREME v5.4.1

For manuscripts utilizing custom algorithms or software that are central to the research but not yet described in published literature, software must be made available to editors and reviewers. We strongly encourage code deposition in a community repository (e.g. GitHub). See the Nature Portfolio [guidelines for submitting code & software](#) for further information.

## Data

Policy information about [availability of data](#)

All manuscripts must include a [data availability statement](#). This statement should provide the following information, where applicable:

- Accession codes, unique identifiers, or web links for publicly available datasets
- A description of any restrictions on data availability
- For clinical datasets or third party data, please ensure that the statement adheres to our [policy](#)

The data analyzed in this paper are available at NCBI's Gene Expression Omnibus (<https://www.ncbi.nlm.nih.gov/geo/>) under accession code GSE156074 (<https://www.ncbi.nlm.nih.gov/geo/query/acc.cgi?acc=GSE156074>). This GEO Series includes annotated links to all the CTCF ChIP-seq files, the RNA-seq files, and the DNase-seq files. The DNase-seq peaks were retrieved from Zenodo (<https://doi.org/10.5281/zenodo.3838751>). The list of identifiers for the subset of samples analyzed in this paper are in Supplementary File 9.

## Human research participants

Policy information about [studies involving human research participants and Sex and Gender in Research](#).

Reporting on sex and gender

N/A

Population characteristics

N/A

Recruitment

N/A

Ethics oversight

N/A

Note that full information on the approval of the study protocol must also be provided in the manuscript.

## Field-specific reporting

Please select the one below that is the best fit for your research. If you are not sure, read the appropriate sections before making your selection.

Life sciences  Behavioural & social sciences  Ecological, evolutionary & environmental sciences

For a reference copy of the document with all sections, see [nature.com/documents/nr-reporting-summary-flat.pdf](https://www.nature.com/documents/nr-reporting-summary-flat.pdf)

## Life sciences study design

All studies must disclose on these points even when the disclosure is negative.

Sample size

No sample size calculation was performed. Analyses were performed on data with 1-3 replicates per condition.

Data exclusions

No data were excluded from datasets used.

Replication

Reproducibility of results were shown by analyzing multiple datasets (e.g., comparing results from 2 different chromosomes).

Randomization

The experimental groups were objectively determined, e.g., examining ChIP-seq data or RNA-seq across multiple cell types at different stages of differentiation. No randomization was used.

Blinding

There was not a specific end-point or read-out to this study, so blinding was not relevant.

## Reporting for specific materials, systems and methods

We require information from authors about some types of materials, experimental systems and methods used in many studies. Here, indicate whether each material, system or method listed is relevant to your study. If you are not sure if a list item applies to your research, read the appropriate section before selecting a response.

## Materials &amp; experimental systems

## Methods

- n/a  Involved in the study
- Antibodies
- Eukaryotic cell lines
- Palaeontology and archaeology
- Animals and other organisms
- Clinical data
- Dual use research of concern

- n/a  Involved in the study
- ChIP-seq
- Flow cytometry
- MRI-based neuroimaging

## ChIP-seq

## Data deposition

- Confirm that both raw and final processed data have been deposited in a public database such as [GEO](#).
- Confirm that you have deposited or provided access to graph files (e.g. BED files) for the called peaks.

## Data access links

*May remain private before publication.*

<https://www.ncbi.nlm.nih.gov/geo/query/acc.cgi?acc=GSE156074>

## Files in database submission

GSE156074\_CTCF\_classes.bed.gz, GSE156074\_RAW.tar, GSE156074\_climbCtcfSigCh12.bw, GSE156074\_climbCtcfSigEr4.bw, GSE156074\_climbCtcfSigEry.bw, GSE156074\_climbCtcfSigEryfl.bw, GSE156074\_climbCtcfSigHpc7.bw, GSE156074\_climbCtcfSigMel.bw, GSE156074\_climbCtcfSigMono.bw, GSE156074\_climbCtcfSigNeu.bw, GSE156074\_climbCtcfSigTcd4.bw, GSE156074\_climbCtcfSigTcd8.bw

## Genome browser session

(e.g. [UCSC](#))

[https://main.genome-browser.bx.psu.edu/cgi-bin/hgTracks?hgS\\_doOtherUser=submit&hgS\\_otherUserName=cak142&hgS\\_otherUserSessionName=Koch\\_CLIMB\\_mm10](https://main.genome-browser.bx.psu.edu/cgi-bin/hgTracks?hgS_doOtherUser=submit&hgS_otherUserName=cak142&hgS_otherUserSessionName=Koch_CLIMB_mm10)

## Methodology

## Replicates

The data used in this manuscript is a re-analysis of already published datasets. Some of the cell types, including LSK (2), CH12 (2), G1E-ER4+E2 (2), erythroblasts (3), MEL (2), and monocytes had replicates available. Only one replicate was available for several rare cell types iMk, CMP, GMP, MEP, CFUMk, and CFUE. Additionally, only one replicate was used for T\_CD4, T\_CD8, and G1E cells.

## Sequencing depth

ID,Target,Cell type,Total reads,Mapped reads mm10,Read length bp,Sequencing parameters

1925,CTCF,G1E,42587210,34060317,50,single end  
 1299,CTCF,LSK,28398021,27118221,50,single end  
 1295,CTCF,LSK,82541801,79058840,50,single end  
 1908,CTCF,iMk,35330050,33568039,50,single end  
 1976,CTCF,CMP,30986124,28925148,50,single end  
 1977,CTCF,GMP,29603542,28200655,50,single end  
 1978,CTCF,MEP,32550070,30632592,50,single end  
 1979,CTCF,CFUMk,27896499,25821404,50,single end  
 1980,CTCF,CFUE,26850438,25531371,50,single end  
 35,CTCF,CH12,14758965,14404662,36,single end  
 47,CTCF,CH12,24993861,24294384,36,single end  
 25,CTCF,G1E-ER4+E2,14336356,13957215,36,single end  
 76,CTCF,G1E-ER4+E2,13857723,12927456,41,single end  
 100146,CTCF,erythroblasts,77792483,60523200,51,single end  
 100162,CTCF,erythroblasts,23408126,22098595,50,single end  
 100163,CTCF,erythroblasts,23637956,22789117,50,single end  
 44,CTCF,MEL,21649898,20950673,36,single end  
 69,CTCF,MEL,33289675,31242619,41,single end  
 100164,CTCF,monocytes,25175692,23464891,36,single end  
 100166,CTCF,monocytes,31232109,28948689,36,single end  
 100151,CTCF,neutrophils,16574362,15638199,50,single end  
 100157,CTCF,T\_CD4,38156242,37438700,36,single end  
 100158,CTCF,T\_CD8,7349830,6894634,39,single end  
 100127,CTCF,HPC7,40085503,37929499,37,single end

## Antibodies

Millipore 07-729

## Peak calling parameters

Wiggle and peaks called using MACS with parameters --format BAM --gsize 1870000000 --tsize 36 --bw 120 --mfold 12 --wig --space 1  
 Filter blacklist regions from peaks, and convert the \*peaks.xls file from MACs to broadpeak format (see UCSC Genome Browser for format specs)  
 S3norm version 1(<https://github.com/guanjue/S3norm>) and default parameters except -r max1

## Data quality

ID,Target,Cell type,FRiP score  
 1299,CTCF,LSK,0.003  
 1295,CTCF,LSK,0.038  
 35,CTCF,CH12,0.07  
 47,CTCF,CH12,0.05  
 25,CTCF,G1E-ER4+E2,0.13  
 76,CTCF,G1E-ER4+E2,0.18  
 100146,CTCF,erythroblasts,0.28  
 100162,CTCF,erythroblasts,0.41  
 100163,CTCF,erythroblasts,0.33  
 44,CTCF,MEL,0.110  
 69,CTCF,MEL,0.144  
 100164,CTCF,monocytes,0.09  
 100166,CTCF,monocytes,0.12  
 1925,CTCF,G1E,0.352  
 1908,CTCF,iMk,0.054  
 1976,CTCF,CMP,0.097  
 1977,CTCF,GMP,0.19  
 1978,CTCF,MEP,0.29  
 1979,CTCF,CFUMk,0.17  
 1980,CTCF,CFUE,0.031  
 100151,CTCF,neutrophils,0.087  
 100157,CTCF,T\_CD4,0.55  
 100158,CTCF,T\_CD8,0.55  
 100127,CTCF,HPC7,0.7

## Software

Basecalls using bcl2fastq-1.8.4, and parameters --no-eamss --mismatches 1  
 Mapping to reference genome mm10 canon with Bowtie 1.0.0 using parameters --chunkmbs 1024 -y -n 2 --best -k 1 --maxbts 800 -l 28 -e 80 --sam-nohead --sam  
 Wiggle and peaks called using MACS with parameters --format BAM --gsize 1870000000 --tsize 36 --bw 120 --mfold 12 --wig --space 1  
 Filter blacklist regions from peaks, and convert the \*peaks.xls file from MACS to broadpeak format (see UCSC Genome Browser for format specs)  
 S3norm version 1(<https://github.com/guanjue/S3norm>) and default parameters except -r max1  
 CLIMB 1.0.0 (<https://doi.org/10.5281/zenodo.7121446>) with dependent Julia package cgibbs.jl version 1.0.0 (<https://doi.org/10.5281/zenodo.7121450>). CLIMB was run at the default settings in all analyses.
